# Supplementary material for: Abortion and Lamb Mortality between Pregnancy Scanning and Lamb Marking for Maiden Ewes in Southern Australia
Source: Animals (Basel). 2021 Dec 21;12(1):10. doi: 10.3390/ani12010010 (PMC8749747; doi:10.3390/ani12010010)
Supplement: Supplementary file 1 [file animals-12-00010-s001.zip › animals-1471938-supplementary.pdf]

*Supplementary Materials*

# **Abortion and Lamb Mortality between Pregnancy Scanning and Lamb Marking for Maiden Ewes in Southern Australia**

**Thomas Clune<sup>1</sup>, Amy Lockwood<sup>1</sup>, Serina Hancock<sup>1</sup>, Andrew N. Thompson<sup>1</sup>, Sue Beetson<sup>1</sup>, Angus J.D. Campbell<sup>2</sup>, Elsa Glanville<sup>3</sup>, Daniel Brookes<sup>3</sup>, Colin Trengove<sup>4</sup>, Ryan O’Handley<sup>4</sup>, Gavin Kearney<sup>5</sup> and Caroline Jacobson<sup>1,\*</sup>**

<sup>1</sup> Centre for Animal Production and Health, Food Futures Institute, Murdoch University, South Street, Murdoch, WA 6150, Australia; t.clune@murdoch.edu.au (T.C.); a.lockwood@murdoch.edu.au (A.L.); s.hancock@murdoch.edu.au (S.H.); Andrew.Thompson@murdoch.edu.au (A.T.); susanbeetson@icloud.com (S.B.)

<sup>2</sup> Nossal Institute for Global Health, Melbourne School of Population and Global Health, University of Melbourne, VIC 3010, Australia; a.campbell@unimelb.edu.au

<sup>3</sup> Mackinnon Project, Faculty of Veterinary & Agricultural Sciences, University of Melbourne, Werribee, VIC 3030, Australia; elsa.glanville@unimelb.edu.au (E.G.); dbrookes@unimelb.edu.au (D.B.)

<sup>4</sup> School of Animal and Veterinary Science, University of Adelaide, Roseworthy, SA 5371, Australia; colin.trengove@adelaide.edu.au (C.T.); ryan.ohandley@adelaide.edu.au (R.O.)

<sup>5</sup> Biometrics Consultant, 36 Payne Road, Hamilton, VIC 3300, Australia; gke29755@bigpond.net.au

\* Correspondence: C.Jacobson@murdoch.edu.au

**Table S1.** Reproductive performance and timing of abortion and lamb mortalities for 19 flocks of ewe lambs across southern Australia between 2018 and 2020

| Flock reference no.                                       | 3      | 4      | 7      | 8     | 11     | 14     | 16     | 17     | 18     | 19     | 20     | 21     | 22     | 23     | 24     | 25    | 27     | 28     | 30     |
|-----------------------------------------------------------|--------|--------|--------|-------|--------|--------|--------|--------|--------|--------|--------|--------|--------|--------|--------|-------|--------|--------|--------|
| State                                                     | WA     | WA     | WA     | WA    | WA     | WA     | WA     | VIC    | VIC    | VIC    | VIC    | VIC    | SA     | SA     | SA     | SA    | VIC    | VIC    | SA     |
| Breed                                                     | NM     | NM     | NM     | Mo    | NM     | NM    | NM     | NM     | NM     |
| <i>Campylobacter</i> vaccination <sup>1</sup>             | No     | No     | No     | No    | No     | No     | No     | Yes    | Yes    | No     | No     | Yes    | Yes    | No     | Yes    | No    | Yes    | Yes    | No     |
| Ewes joined ( <i>n</i> )                                  | 198    | 200    | 198    | 189   | 213    | 197    | 162    | 196    | 197    | 203    | 204    | 206    | 195    | 201    | 196    | 302   | 200    | 202    | 388    |
| Conception rate (%) <sup>2</sup>                          | 74.7   | 65     | 76.3   | 45.5  | 68.5   | 85.3   | 63.6   | 54.1   | 85.8   | 87.2   | 80.4   | 76.7   | 72.3   | 81.6   | 62.2   | 92.4  | 86.5   | 78.7   | 57.7   |
| Scanning rate (%) <sup>3</sup>                            | 97.5   | 106.5  | 122.2  | 57.7  | 74.6   | 110.2  | 91.4   | 78.6   | 146.7  | 143.3  | 124.0  | 124.3  | 123.6  | 120.9  | 96.9   | 155.6 | 155.5  | 133.2  | 79.4   |
| Marking rate (%) <sup>4</sup>                             | 60.6   | 82.0   | 88.4   | 38.6  | 54.5   | 45.2   | 60.5   | 67.3   | 117.3  | 70.9   | 73.0   | 75.7   | 91.8   | 99.0   | 28.1   | 30.1  | 115.0  | 94.6   | 49.5   |
| Aborted foetuses recovered ( <i>n</i> )                   | 1      | 0      | 0      | 0     | 0      | 0      | 0      | 0      | 0      | 3      | 0      | 0      | 0      | 0      | 1      | 0     | 0      | 0      | 0      |
| <b>Foetal and lamb mortality (% foetuses)<sup>5</sup></b> |        |        |        |       |        |        |        |        |        |        |        |        |        |        |        |       |        |        |        |
| Overall mortality (scan 1 – marking)                      | 37.8   | 23.0   | 27.7   | 33.0  | 27.0   | 59.0   | 33.8   | 14.3   | 20.1   | 50.5   | 41.1   | 39.1   | 25.7   | 18.1   | 71.1   | 65.6  | 26.0   | 29.0   | 37.7   |
| Mid-pregnancy abortion (scan 1 – scan 2) <sup>5</sup>     | 6.2    | 1.4    | 1.2    | 1.8   | 0.0    | 21.7   | 3.4    | 0.0    | 0.0    | 8.6    | 4.3    | 0.0    | 0.8    | 2.1    | 48.4   | 1.3   | 0.0    | 1.1    | 1.3    |
| Late-pregnancy loss (scan 2 – birth) <sup>6</sup>         | 6.2    | 6.1    | 17.8   | 16.5  | 8.8    | 9.2    | 8.8    | 0.0    | 3.1    | 27.5   | 11.1   | 25.8   | 2.1    | 4.9    | 7.9    | NA    | 4.8    | 10.8   | 16.9   |
| Lamb mortality (birth – marking) <sup>7</sup>             | 25.4   | 15.5   | 8.7    | 14.7  | 18.2   | 28.1   | 21.6   | 14.3   | 17.0   | 14.4   | 25.7   | 13.3   | 22.8   | 11.1   | 14.7   | NA    | 21.2   | 17.1   | 19.5   |
| Chi-square <i>P</i> -value                                | <0.001 | <0.001 | <0.001 | <0.01 | <0.001 | <0.001 | <0.001 | <0.001 | <0.001 | <0.001 | <0.001 | <0.001 | <0.001 | <0.001 | <0.001 | NA    | <0.001 | <0.001 | <0.001 |
| <b>Mid-pregnancy abortion (ewes)</b>                      |        |        |        |       |        |        |        |        |        |        |        |        |        |        |        |       |        |        |        |
| <i>n</i>                                                  | 11     | 2      | 1      | 1     | 0      | 40     | 3      | 0      | 0      | 15     | 7      | 0      | 1      | 3      | 61     | 4     | 0      | 3      | 3      |
| %                                                         | 7.4    | 1.5    | 0.7    | 1.2   | 0.0    | 23.8   | 2.9    | 0.0    | 0.0    | 8.5    | 4.3    | 0.0    | 0.7    | 1.8    | 50.0   | 1.4   | 0.0    | 1.9    | 1.3    |

NA: not available WA: Western Australia

SA: South Australia

VIC: Victoria

NM: non-Merino

Mo: Merino

<sup>1</sup> Vaccination with Ovilis Campyvax™ (*Campylobacter fetus* and *Campylobacter jejuni*)<sup>2</sup> Number of ewes pregnant / number of ewes joined<sup>3</sup> Number foetuses scanned / number of ewes joined<sup>4</sup> Number of lambs marked / number of ewes joined<sup>5</sup> Number of foetuses (or lambs) lost from start to end of respective period indicated in parentheses / number of foetuses at scan 1 (%).<sup>6</sup> Includes lambs that were born and not recovered at lambing rounds (e.g. lost to predation).<sup>7</sup> Includes lambs dead at birth (full-term)

**Table S2.** Reproductive performance and timing of abortion and lamb mortalities for 11 flocks of maiden Merino two-tooth ewes across southern Australia between 2018 and 2020.

| Flock reference no.                                       | 1      | 2      | 5      | 6    | 9     | 10     | 12     | 13     | 15     | 26     | 29     |
|-----------------------------------------------------------|--------|--------|--------|------|-------|--------|--------|--------|--------|--------|--------|
| State                                                     | WA     | WA     | SA     | SA   | SA    | WA     | SA     | VIC    | WA     | VIC    | VIC    |
| <i>Campylobacter</i> vaccination <sup>1</sup>             | No     | No     | No     | No   | No    | No     | No     | No     | No     | No     | No     |
| Ewes joined (n)                                           | 213    | 188    | 194    | 197  | 202   | 200    | 197    | 188    | 210    | 190    | 191    |
| Conception rate (%) <sup>2</sup>                          | 87.3   | 94.7   | 94.8   | 83.2 | 95.5  | 84.5   | 92.9   | 58.5   | 97.1   | 72.1   | 93.1   |
| Scanning rate (%) <sup>3</sup>                            | 116.9  | 116.5  | 109.3  | 90.9 | 113.9 | 89.5   | 113.7  | 59.6   | 135.2  | 85.3   | 121.5  |
| Marking rate (%) <sup>4</sup>                             | 93.9   | 81.4   | 79.4   | NA   | 89.1  | 66.0   | 81.2   | 28.2   | 101.0  | 52.1   | 93.2   |
| <b>Foetal and lamb mortality (% foetuses)<sup>5</sup></b> |        |        |        |      |       |        |        |        |        |        |        |
| Overall mortality<br>(scan 1 – marking)                   | 19.7   | 30.1   | 27.4   | NA   | 21.7  | 26.3   | 28.6   | 52.7   | 25.4   | 38.9   | 23.3   |
| Mid-pregnancy abortion<br>(scan 1 – scan 2) <sup>5</sup>  | 0.0    | 0.0    | 0.9    | 0.0  | 0.0   | 0.0    | 0.9    | 0.9    | 0.7    | 3.7    | 1.7    |
| Late-pregnancy loss<br>(scan 2 – birth) <sup>6</sup>      | 0.0    | 4.1    | 3.8    | NA   | NA    | 15.6   | 3.1    | 40.2   | 1.8    | 21.0   | 3.0    |
| Lamb mortality<br>(birth – marking) <sup>7</sup>          | 19.7   | 26.0   | 22.6   | NA   | NA    | 10.6   | 24.6   | 11.6   | 22.9   | 14.2   | 18.5   |
| Chi-square <i>P</i> -value                                | <0.001 | <0.001 | <0.001 | NA   | NA    | <0.001 | <0.001 | <0.001 | <0.001 | <0.001 | <0.001 |
| <b>Mid-pregnancy abortion (ewes)</b>                      |        |        |        |      |       |        |        |        |        |        |        |
| <i>n</i>                                                  | 0      | 0      | 2      | 0    | 0     | 0      | 2      | 1      | 1      | 6      | 4      |
| %                                                         | 0.0    | 0.0    | 1.1    | 0.0  | 0.0   | 0.0    | 1.1    | 0.9    | 0.5    | 4.4    | 2.2    |

NA: not available      WA: Western Australia      SA: South Australia      VIC: Victoria

<sup>1</sup> Vaccination with Ovilis Campyvax® (*Campylobacter fetus* and *Campylobacter jejuni*)<sup>2</sup> Number of ewes pregnant / number of ewes joined<sup>3</sup> Number foetuses scanned / number of ewes joined<sup>4</sup> Number of lambs marked / number of ewes joined<sup>5</sup> Number of foetuses (or lambs) lost from start to end of respective period indicated in parentheses / number of foetuses at scan 1 (%).<sup>6</sup> Includes lambs that were born and not recovered at lambing rounds (e.g. lost to predation).<sup>7</sup> Includes lambs dead at birth (full-term)

**Table S3.** Mean of flock means for liveweight and body condition score for single- and multiple-bearing ewes from ewe lamb and maiden Merino two-tooth ewe flocks in southern Australia between 2018 and 2020.

|                             | Mean liveweight and body condition score (range) |                    |                       |                    |
|-----------------------------|--------------------------------------------------|--------------------|-----------------------|--------------------|
|                             | Ewe lamb                                         |                    | Merino two-tooth ewes |                    |
|                             | Single                                           | Multiple           | Single                | Multiple           |
| <b>Liveweight (kg)</b>      |                                                  |                    |                       |                    |
| Joining <sup>1</sup>        | 48.0 (39.7 - 65.6)                               | 49.8 (40.4 - 67.4) | 48.6 (37.5 - 67.5)    | 49.2 (42.3 - 67.8) |
| Scan 1 <sup>1</sup>         | 50.5 (41.0 - 65.6)                               | 53.5 (41.9 - 67.6) | 50.8 (37.9 - 73.0)    | 53.8 (49.3 - 75.1) |
| Scan 2 <sup>2</sup>         | 51.0 (34.2 - 68.5)                               | 56.3 (36.3 - 72.6) | 51.9 (38.4 - 68.3)    | 56.1 (48.0 - 69.3) |
| Pre-lambing <sup>2</sup>    | 55.4 (39.7 - 77.6)                               | 61.9 (41.9 - 82.9) | 55.9 (41.0 - 76.5)    | 61.9 (52.1 - 78.0) |
| <b>Body condition score</b> |                                                  |                    |                       |                    |
| Joining <sup>1</sup>        | 3.3 (2.4 - 4.0)                                  | 3.4 (2.4 - 4.0)    | 2.9 (2.6 - 3.6)       | 3.0 (2.6 - 3.5)    |
| Scan 1 <sup>1</sup>         | 3.4 (2.8 - 4.0)                                  | 3.4 (2.7 - 4.0)    | 2.9 (2.6 - 3.6)       | 3.0 (2.6 - 3.4)    |
| Scan 2 <sup>2</sup>         | 3.3 (2.6 - 3.9)                                  | 3.3 (2.7 - 4.0)    | 2.8 (2.0 - 3.6)       | 2.9 (2.5 - 3.7)    |
| Pre-lambing <sup>2</sup>    | 3.3 (2.7 - 4.1)                                  | 3.4 (2.6 - 4.1)    | 2.8 (2.5 - 3.5)       | 2.8 (2.5 - 3.5)    |

<sup>1</sup> Flocks 6 and 9 excluded from analyses; <sup>2</sup> Flocks 6, 9 and 25 excluded from analyses.
